# Supplementary material
Source: PubMed Central journal article supplement (PMC7518051)

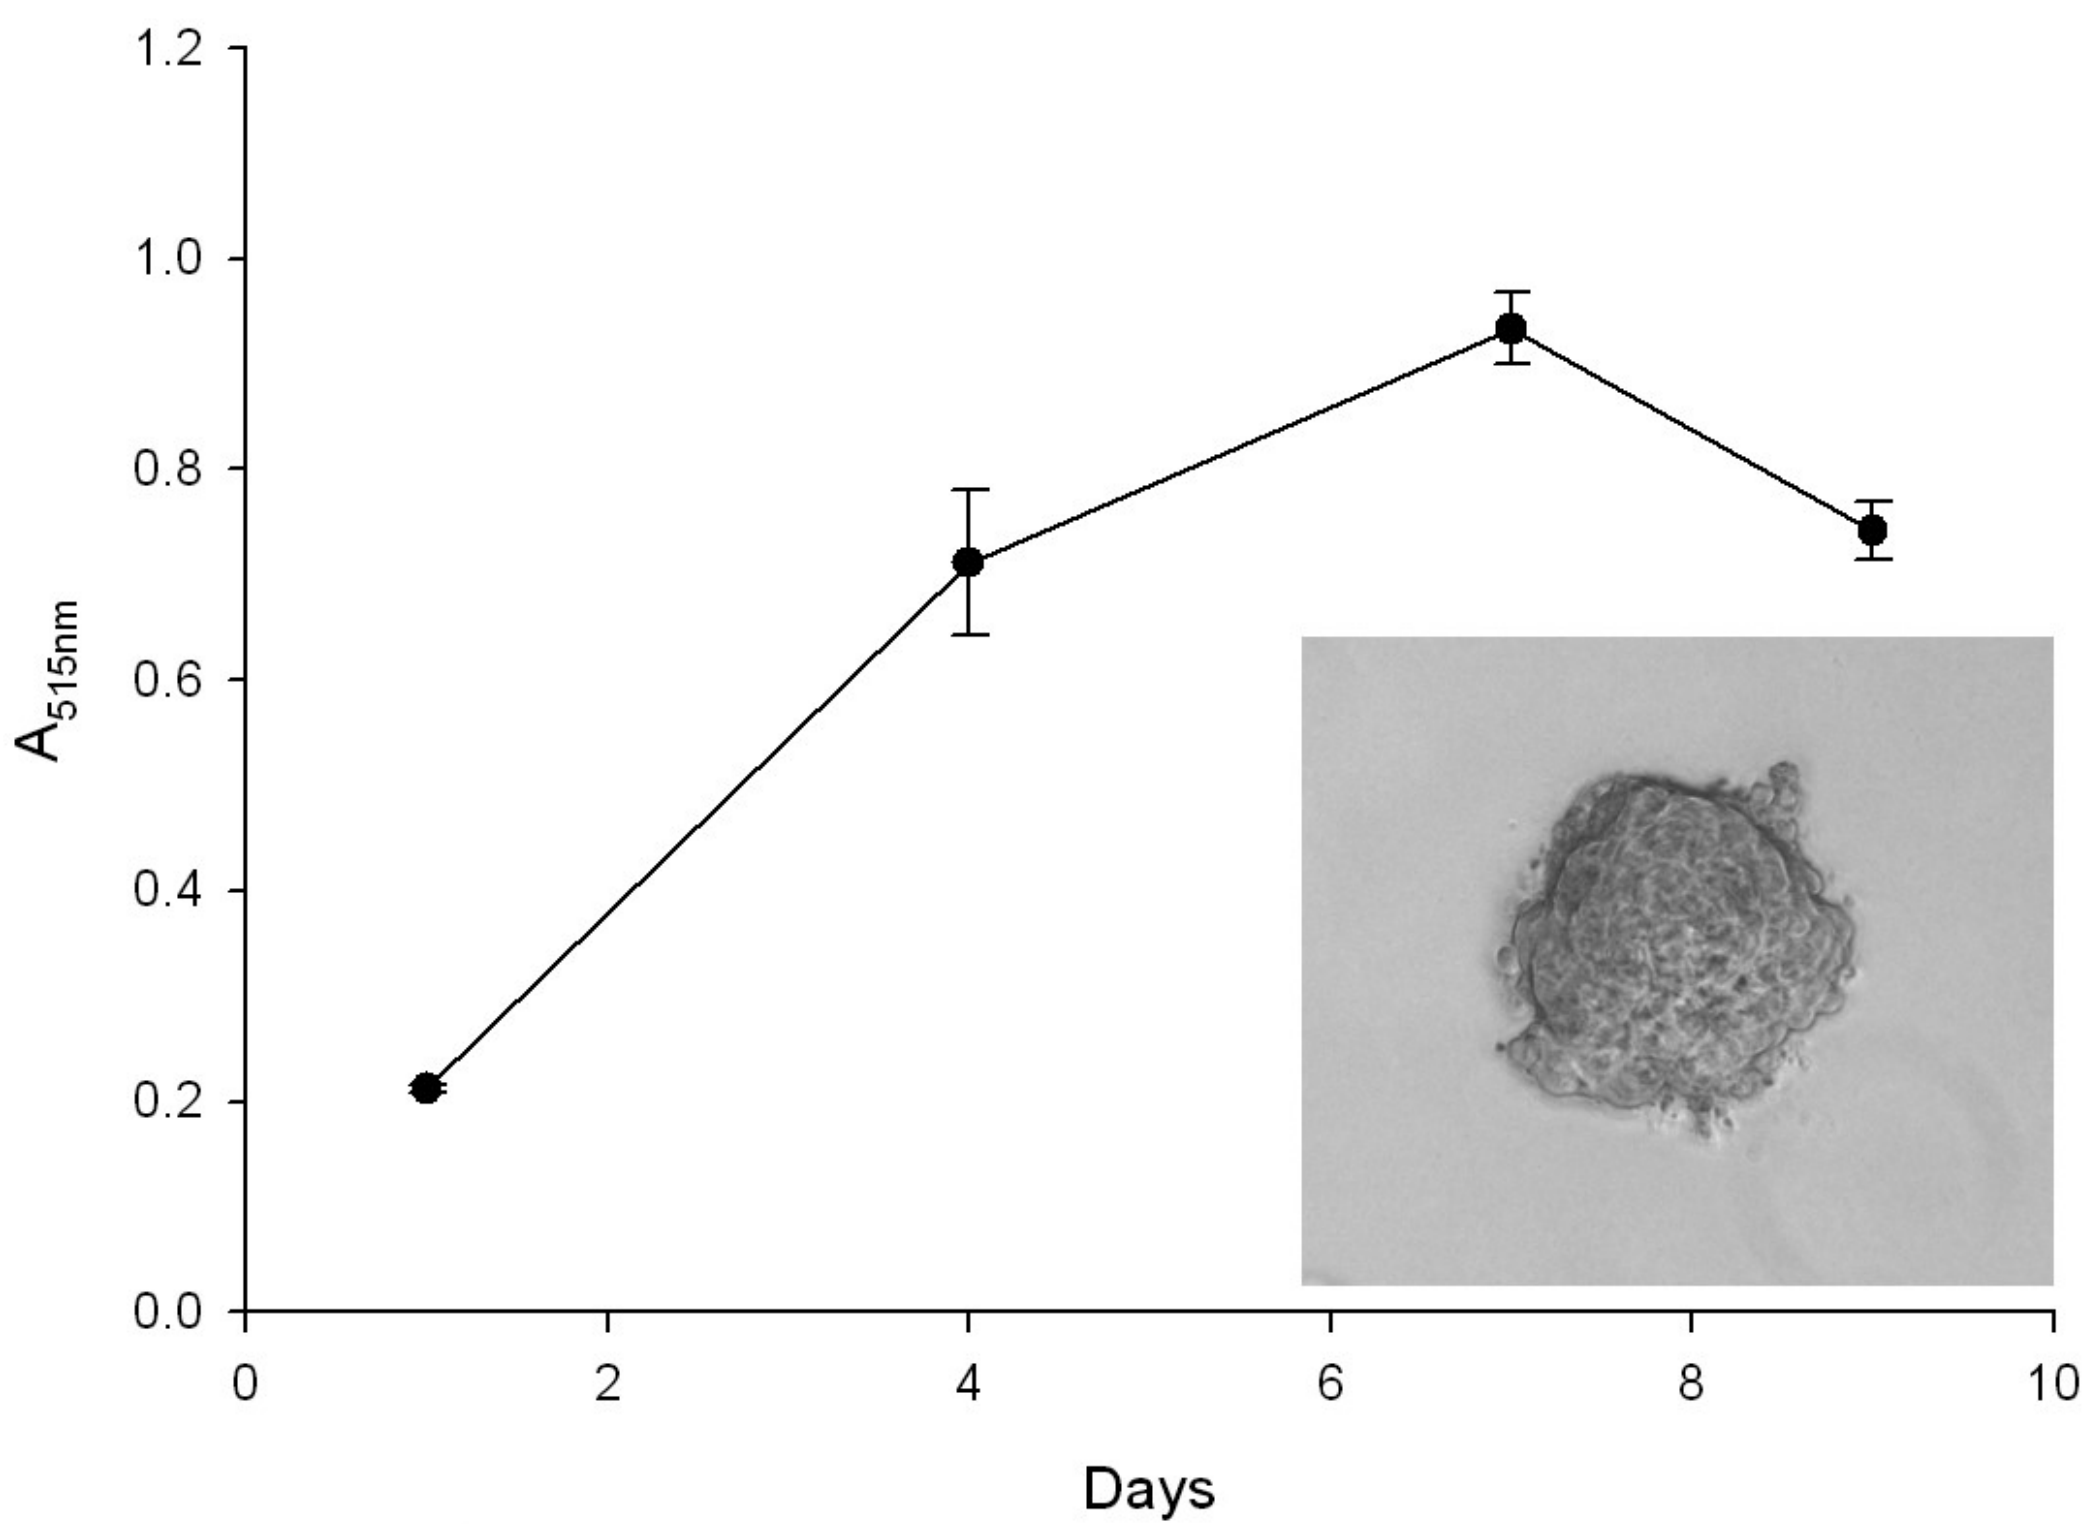

Supplemental figure S1

Supplement: NIHMS1612525-supplement-Supplemental_figure.pdf [file NIHMS1612525-supplement-Supplemental_figure.pdf]
